# **A live-cell imaging system for visualizing the transport of Marburg virus nucleocapsid-like structures**

Yuki Takamatsu<sup>1, 3</sup>, Takeshi Noda<sup>3,4\*</sup> and Stephan Becker<sup>1,2\*</sup>

<sup>1</sup>Institut für Virologie, Philipps-Universität Marburg, Germany;

<sup>2</sup>German Center of Infection Research (DZIF), partner site Giessen-Marburg-  
Langen, Marburg, Germany;

<sup>3</sup>Laboratory of Ultrastructural Virology, Institute for Frontier Life and Medical  
Sciences, Kyoto University, Japan

<sup>4</sup>Laboratory of Ultrastructural Virology, Graduate School of Biostudies, Kyoto  
University, Japan

\*Corresponding authors:

Takeshi Noda

Laboratory of Ultrastructural Virology

Institute for Frontier Life and Medical Sciences

Kyoto University

19 Japan

20 Tel.: +49 6421/28-66254

21 Fax.: +49 6421/28-68962

22 Email: [t-noda@kyoto-uni.ac.jp](mailto:t-noda@kyoto-uni.ac.jp)

23

24 Stephan Becker

25 Institute of Virology

26 Philipps-University Marburg

27 Hans-Meerwein-Straße

28 35043 Marburg

29 Germany

30 Tel.: +49 6421/28-66254

31 Fax.: +49 6421/28-68962

32 Email: [becker@staff.uni-marburg.de](mailto:becker@staff.uni-marburg.de)

## Abstract

Live-cell imaging is a powerful tool for visualization of the spatio-temporal dynamics of living organisms. Although this technique is utilized to visualize nucleocapsid transport in Marburg virus (MARV)- or Ebola virus-infected cells, the experiments require biosafety level-4 (BSL-4) laboratories, which are restricted to trained and authorized individuals. To overcome this limitation, we developed a live-cell imaging system to visualize MARV nucleocapsid-like structures using fluorescence-conjugated viral proteins, which can be conducted outside BSL-4 laboratories. Our experiments revealed that nucleocapsid-like structures have similar transport characteristics to nucleocapsids observed in MARV-infected cells. This system provides a safe platform to evaluate antiviral drugs that inhibit MARV nucleocapsid transport.

## Introduction

Marburg virus (MARV), together with the Ebola virus (EBOV), belongs to the family *Filoviridae*, and has a roughly 19 kb non-segmented, single-stranded, negative-sense RNA genome. It causes severe hemorrhagic fever with high fatality rates. MARV epidemics have occasionally been reported in Central Africa, with the largest one, having a 90% fatality rate, being reported in Angola between 2004 and 2005 (CDC, 2014). Currently, there are no approved vaccines or antiviral therapeutics available to prevent or treat MARV infection. Therefore, understanding the interplay between viral and host proteins during MARV replication is necessary to establish countermeasures for the diseases. For example, revealing the mechanisms for the assembly and transport of nucleocapsids, which comprise viral genomic RNA, nucleoprotein (NP), viral proteins (VP24, VP30, VP35), and polymerase L, and are responsible for the transcription and replication of the viral genome, might contribute to the development of new therapeutic options.

The main nucleocapsid protein of MARV is NP, which is responsible for the encapsidation of single-stranded viral genomic RNA (Bharat *et al.*, 2012, Muhlberger *et al.*, 1999). In addition to NP, MARV nucleocapsids also contain the

64 minor matrix protein VP24 and the polymerase cofactor VP35, both of which are  
65 essential structural elements that directly interact with NP to build a helical  
66 nucleocapsid approximately 1000 nm in length and 50 nm in diameter (Huang *et*  
67 *al.*, 2002, Watanabe *et al.*, 2006, Bharat *et al.*, 2012). Furthermore, the viral  
68 polymerase L and the transcription factor VP30 are also associated with the  
69 nucleocapsid (Hartlieb *et al.*, 2003, Biedenkopf *et al.*, 2013). The core complex  
70 of the nucleocapsid, formed by the NP, VP35, and VP24 proteins together with  
71 the viral RNA, is defined as a nucleocapsid-like structure (NCLS, Fig. 1a). In  
72 MARV- and EBOV-infected cells, immunofluorescence microscopy, as well as  
73 live-cell imaging, have been used to visualize and analyze nucleocapsids by  
74 fluorescently labeling the nucleocapsid proteins (Schudt *et al.*, 2013, Schudt *et*  
75 *al.*, 2015, Becker *et al.*, 1996, Kolesnikova *et al.*, 2004a, Kolesnikova *et al.*,  
76 2004b). According to these reports, nucleocapsid formation occurs in the  
77 perinuclear inclusion bodies, following which they are transported into the  
78 cytoplasm and redistributed prior to budding through the cell surface. The velocity  
79 of nucleocapsid movement inside cells ranges from 100 nm/s to 500 nm/s in  
80 MARV- or EBOV-infection (Schudt *et al.*, 2013, Schudt *et al.*, 2015). Application  
81 of specific cytoskeleton inhibitors revealed that the transport of MARV

nucleocapsids was dependent on actin polymerization. Viral matrix protein VP40, which is a peripheral membrane protein and plays a pivotal role in filamentous virion formation, is essential for the recruitment of nucleocapsids to the cell periphery and for their incorporation into progeny virions (Noda *et al.*, 2007, Bharat *et al.*, 2012, Noda *et al.*, 2002, Dolnik *et al.*, 2010). The surface glycoprotein GP, which is an integral membrane protein and is responsible for cell entry, forms the filamentous virions together with VP40 (Fig. 1b) (Becker *et al.*, 1996, Mittler *et al.*, 2007, Beniac & Booth, 2017, Booth *et al.*, 2013).

Live-cell imaging is a powerful tool for visualization of the spatio-temporal dynamics of living organisms. In addition to immunofluorescence microscopy, live-cell imaging microscopy has been utilized to visualize the localization of viral proteins, and interactions between viral and host proteins in various virus-infected cells (Nanbo *et al.*, 2013, Hoenen *et al.*, 2012, Lakdawala *et al.*, 2014, Becker *et al.*, 1996). However, because of its high pathogenicity, MARV must be handled under the highest biosafety conditions [biosafety level 4 (BSL-4)], which complicates and delays research using live-cell imaging (Falzarano *et al.*, 2011). In this study, we developed a safe, live-cell imaging system, following a previously established method for EBOV (Takamatsu *et al.*, 2018), to visualize MARV

100 nucleocapsid-like structures (NCLSs) in cells expressing viral proteins, outside of  
101 BSL-4 laboratories. By using this live-cell imaging system, we were able to  
102 analyze interactions between NCLSs and the cellular cytoskeleton, as well as  
103 intracellular transport of NCLSs.

104

105

## Materials and methods

### Cell culture.

Huh-7 (human hepatoma) cells were maintained at 37 °C and 5% CO<sub>2</sub> in Dulbecco's Modified Eagle Medium (DMEM, Life Technologies) supplemented with 10% (vol/vol) Fetal bovine serum (FBS , PAN Biotech), 5 mM L-glutamine (Q; Life Technologies), 50 U/mL penicillin, and 50 µg/mL streptomycin (PS; Life Technologies).

### Plasmids and transfection.

Plasmids encoding the MARV structural proteins (NP, VP35, VP24, L, VP40 and GP): pCAGGS-NP, pCAGGS-VP35, pCAGGS-VP24, pCAGGS-L, pCAGGS-VP40, and pCAGGS-GP, and a MARV minigenome-expressing plasmid which encodes a *Renilla* luciferase were used (Wenigenrath *et al.*, 2010, Hoenen *et al.*, 2011). The plasmid pCAGGS-VP30-GFP, coding for the green fluorescent protein-VP30 fusion protein, was produced as previously described (Schudt *et al.*, 2013). The transfection was performed in 50 µL Opti-MEM without phenol red (Life Technologies) using TranSIT (Mirus) according to the manufacturer's instructions.



## **Lice cell imaging microscopy.**

A total of  $2 \times 10^4$  Huh-7 cells were seeded onto a  $\mu$ -Slide 4 well (Ibidi) and cultivated in DMEM/PS/Q with 10% FBS. Each well was transfected with the following plasmids, encoding all MARV structural proteins: (250 ng of pCAGGS-NP, 50 ng of pCAGGS-VP35, 125 ng of pCAGGS-VP30-GFP, 50 ng of pCAGGS-VP24, 500 ng of pCAGGS-L, 125 ng of pCAGGS-VP40 and 125 ng of pCAGGS-GP), together with a T7-driven, MARV minigenome-expressing plasmid, which encodes a *Renilla* luciferase, and a T7 polymerase-coding plasmid (pCAGGS-T7) (Wenigenrath et al., 2010, Hoenen et al., 2011). The inoculum was removed at 1 h post-transfection (p.t.), and 500  $\mu$ L CO<sub>2</sub>-independent Leibovitz's medium (Life Technologies) with PS/Q, non-essential amino acid solution, and 20% (vol/vol) FBS were added. Live-cell time-lapse experiments were recorded with a Nikon ECLIPSE TE2000-E using a 63 $\times$  oil objective or a GE healthcare Delta Vision Elite using a 60 $\times$  oil objective in biosafety level-2 laboratories.

## **Treatment of cells with cytoskeleton-modulating drugs.**

Cells were treated with 15  $\mu$ M nocodazole (Sigma), 0.3  $\mu$ M cytochalasin D

(Sigma), or 0.15% dimethyl sulfoxide (DMSO, Sigma), following previous publication (Schudt et al., 2013). The chemicals were added to the cell culture medium 3 hours prior to observation.

#### **Image processing and analysis.**

Acquired pictures and movie sequences were processed using the Fiji plugin “TrackMate” (Tinevez *et al.*, 2017, Schindelin *et al.*, 2012).

## Results and Discussion

### Establishment of a live-cell imaging system for MARV NCLSs transport.

The Marburg virus VLP system, which models a complete, single infectious cycle, has been developed and used to analyze transcription and replication, as well as the budding processes (Wenigenrath et al., 2010, Hoenen et al., 2011). In this study, we attempted to visualize MARV NCLSs transport in Huh-7 cells, which is a suitable method to determine the sequential intracytoplasmic movement of MARV nucleocapsids (Schudt et al., 2013), by using this VLP system following the procedure established in EBOV (Takamatsu et al., 2018). Transfection of the VLP components with the following modifications: replacing VP30 with VP30-GFP, was performed as described in Figure 2a. We employed this VLP-based system in all subsequent experiments in this study.

At 18 h p.t., we detected a large number of signals with various shapes (Supplementary Movie 1). Over 1,000 signals in the acquired movie sequences were analyzed. The representing sequence was expressed as the maximum intensity projection, in which the image projected maximum intensity of each time-lapse were plotted. (Fig. 2b). Among the signals, we focused on the signals

showing long-distance and directional transport, which represent NCLSs trajectories (Takamatsu et al., 2018). We detected trajectories with lengths ranging from 100 nm to 20  $\mu$ m, with a mean length of  $1.89 \pm 0.91 \mu$ m (Fig. 2c). The direction of movement of each NCLS also varied, though the cause of this variation remains unclear. The speed of MARV NCLSs transport ranged from 10 nm/s to 500 nm/s, with a mean velocity of  $167 \pm 96$  nm/s (Fig. 2d), which is comparable to the velocity of nucleocapsids transport in MARV-infected cells analyzed in BSL-4 laboratories (Schudt et al., 2013). In summary, the movement characteristics of NCLSs in our system is similar to those of nucleocapsids in MARV-infected cells.

### **Actin polymerization is required for MARV NCLSs transport.**

In MARV-infected cells, the microtubule depolymerizing drug nocodazole does not alter the movement of nucleocapsids, whereas the actin depolymerizing drug cytochalasin D arrests it (Schudt et al., 2013). To confirm the relevance of the live-cell imaging system we developed in this study, we analyzed NCLSs movement after treatment with cytoskeletal modulation drugs. Huh-7 cells were transfected with plasmids as described in Figure 2a. The culture medium was replaced at 15 h p.t. with Leibovitz's medium containing either 0.15 % DMSO

(control), 0.15 M nocodazole, or 0.3  $\mu$ M cytochalasin D (Fig. 3a-d, Supplementary Movie 2-4) (Schudt et al., 2013). After incubation the cells with cytoskeletal modulating drugs for 3h, time-lapse images were acquired. Nocodazole treatment did not alter the trajectory length of NCLSs transport in comparison to the control, whereas cytochalasin D treatment induced immediate cessation of long-distance transport (Fig. 3e-g). The mean velocity of NCLSs transport in the control or nocodazole-treated cells was  $188 \pm 98$  nm/s and  $219 \pm 99$  nm/s, respectively (Fig. 3h). On the other hand, only a few non-specific NCLSs movements were detectable in cytochalasin D-treated cells, with a mean velocity of  $2.73 \pm 23$  nm/s (Fig. 3i-j). These results confirmed that NCLSs transport is dependent on actin polymerization, as well as the availability of our assay to test candidate drugs which target nucleocapsid intracellular transport.

## Concluding remarks

In the present study, we developed a live-cell imaging system for cells expressing viral proteins, which can be safely used in BSL-2 laboratories. Furthermore, we demonstrated the relevance of our system as a substitute for the analysis of nucleocapsids transport in MARV-infected cells. Currently, cellular

204 factors involved in the nucleocapsid transport have not been fully understood.  
205 The combined approach of gene silencing and inhibitor screening using the  
206 system we developed can be utilized to identify the key host factors for the  
207 intracellular transport of MARV nucleocapsids. Moreover, it is noteworthy that the  
208 technical approach developed here might be applicable to study the nucleocapsid  
209 transport of other mononegaviruses, as well as to characterize antivirals inhibiting  
210 nucleocapsid transport.  
211

## Acknowledgments

The authors are grateful to Olga Dolnik and Gordian Schudt (Philipps University Marburg, Germany) for fruitful discussion.

## Funding

The work was supported by Japan Society for the Promotion of Science JSPS Grant number 18J01631, 19K16666 (to Y.T.), by AMED, Research Program on Emerging and Re-emerging Infectious Diseases, by AMED Japanese Initiative for Progress of Research on Infectious Disease for global Epidemic, by JSPS Core-to-Core Program A, the Advanced Research Networks, by Grant for Joint Research Project of the Institute of Medical Science, University of Tokyo, by Joint Usage/Research Center program of Institute for Frontier Life and Medical Sciences Kyoto University, by the Daiichi Sankyo Foundation of Life Science, and by the Takeda Science Foundation (to T.N.), and by the Deutsche Forschungsgemeinschaft (DFG, German research foundation) Project number 197785619-SFB 1021 (to S.B.).

## References

- Becker, S., Klenk, H. D. & Muhlberger, E. (1996) Intracellular transport and processing of the Marburg virus surface protein in vertebrate and insect cells. *Virology*, 225, 145-155.
- Beniac, D. R. & Booth, T. F. (2017) Structure of the Ebola virus glycoprotein spike within the virion envelope at 11 Å resolution. *Scientific reports*, 7, 46374.
- Bharat, T. A., Noda, T., Riches, J. D., Kraehling, V., Kolesnikova, L., Becker, S., Kawaoka, Y. & Briggs, J. A. (2012) Structural dissection of Ebola virus and its assembly determinants using cryo-electron tomography. *Proceedings of the National Academy of Sciences of the United States of America*, 109, 4275-4280.
- Biedenkopf, N., Hartlieb, B., Hoenen, T. & Becker, S. (2013) Phosphorylation of Ebola virus VP30 influences the composition of the viral nucleocapsid complex: impact on viral transcription and replication. *The Journal of biological chemistry*, 288, 11165-11174.
- Booth, T. F., Rabb, M. J. & Beniac, D. R. (2013) How do filovirus filaments bend without breaking? *Trends in microbiology*, 21, 583-593.
- CDC (2014) Chronology of Marburg Hemorrhagic Fever Outbreaks.
- Dolnik, O., Kolesnikova, L., Stevermann, L. & Becker, S. (2010) Tsg101 is recruited by a late domain of the nucleocapsid protein to support budding of Marburg virus-like particles. *Journal of virology*, 84, 7847-7856.
- Falzarano, D., Geisbert, T. W. & Feldmann, H. (2011) Progress in filovirus vaccine development: evaluating the potential for clinical use. *Expert review of vaccines*, 10, 63-77.
- Hartlieb, B., Modrof, J., Muhlberger, E., Klenk, H. D. & Becker, S. (2003) Oligomerization of Ebola virus VP30 is essential for viral transcription and can be inhibited by a synthetic peptide. *The Journal of biological chemistry*, 278, 41830-41836.
- Hoenen, T., Groseth, A., de Kok-Mercado, F., Kuhn, J. H. & Wahl-Jensen, V. (2011) Minigenomes, transcription and replication competent virus-like particles and beyond: reverse genetics systems for filoviruses and other negative stranded hemorrhagic fever viruses. *Antiviral research*, 91, 195-208.
- Hoenen, T., Shabman, R. S., Groseth, A., Herwig, A., Weber, M., Schudt, G., Dolnik, O., Basler, C. F., Becker, S. & Feldmann, H. (2012) Inclusion bodies are a site of ebolavirus replication. *Journal of virology*, 86, 11779-11788.
- Huang, Y., Xu, L., Sun, Y. & Nabel, G. J. (2002) The assembly of Ebola virus nucleocapsid requires virion-associated proteins 35 and 24 and posttranslational modification of nucleoprotein. *Molecular cell*, 10, 307-316.



- 265 Kolesnikova, L., Bamberg, S., Berghofer, B. & Becker, S. (2004a) The matrix protein of  
266 Marburg virus is transported to the plasma membrane along cellular membranes:  
267 exploiting the retrograde late endosomal pathway. *Journal of virology*, 78, 2382-2393.
- 268 Kolesnikova, L., Berghofer, B., Bamberg, S. & Becker, S. (2004b) Multivesicular bodies as a  
269 platform for formation of the Marburg virus envelope. *Journal of virology*, 78, 12277-  
270 12287.
- 271 Lakdawala, S. S., Wu, Y., Wawrzusin, P., Kabat, J., Broadbent, A. J., Lamirande, E. W., Fodor,  
272 E., Altan-Bonnet, N., Shroff, H. & Subbarao, K. (2014) Influenza A virus assembly  
273 intermediates fuse in the cytoplasm. *PLoS pathogens*, 10, e1003971.
- 274 Mittler, E., Kolesnikova, L., Strecker, T., Garten, W. & Becker, S. (2007) Role of the  
275 transmembrane domain of marburg virus surface protein GP in assembly of the viral  
276 envelope. *Journal of virology*, 81, 3942-3948.
- 277 Muhlberger, E., Weik, M., Volchkov, V. E., Klenk, H. D. & Becker, S. (1999) Comparison of  
278 the transcription and replication strategies of marburg virus and Ebola virus by  
279 using artificial replication systems. *Journal of virology*, 73, 2333-2342.
- 280 Nanbo, A., Watanabe, S., Halfmann, P. & Kawaoka, Y. (2013) The spatio-temporal  
281 distribution dynamics of Ebola virus proteins and RNA in infected cells. *Scientific*  
282 *reports*, 3, 1206.
- 283 Noda, T., Sagara, H., Suzuki, E., Takada, A., Kida, H. & Kawaoka, Y. (2002) Ebola virus VP40  
284 drives the formation of virus-like filamentous particles along with GP. *Journal of*  
285 *virology*, 76, 4855-4865.
- 286 Noda, T., Watanabe, S., Sagara, H. & Kawaoka, Y. (2007) Mapping of the VP40-binding  
287 regions of the nucleoprotein of Ebola virus. *Journal of virology*, 81, 3554-3562.
- 288 Schindelin, J., Arganda-Carreras, I., Frise, E., Kaynig, V., Longair, M., Pietzsch, T., Preibisch,  
289 S., Rueden, C., Saalfeld, S., Schmid, B., Tinevez, J. Y., White, D. J., Hartenstein, V.,  
290 Eliceiri, K., Tomancak, P. & Cardona, A. (2012) Fiji: an open-source platform for  
291 biological-image analysis. *Nature methods*, 9, 676-682.
- 292 Schudt, G., Dolnik, O., Kolesnikova, L., Biedenkopf, N., Herwig, A. & Becker, S. (2015)  
293 Transport of Ebolavirus Nucleocapsids Is Dependent on Actin Polymerization: Live-  
294 Cell Imaging Analysis of Ebolavirus-Infected Cells. *The Journal of infectious diseases*,  
295 212 Suppl 2, S160-166.
- 296 Schudt, G., Kolesnikova, L., Dolnik, O., Sodeik, B. & Becker, S. (2013) Live-cell imaging of  
297 Marburg virus-infected cells uncovers actin-dependent transport of nucleocapsids  
298 over long distances. *Proceedings of the National Academy of Sciences of the United*  
299 *States of America*, 110, 14402-14407.
- 300 Takamatsu, Y., Kolesnikova, L. & Becker, S. (2018) Ebola virus proteins NP, VP35, and VP24

are essential and sufficient to mediate nucleocapsid transport. *Proceedings of the National Academy of Sciences of the United States of America*, 115, 1075-1080.

Tinevez, J. Y., Perry, N., Schindelin, J., Hoopes, G. M., Reynolds, G. D., Laplantine, E., Bednarek, S. Y., Shorte, S. L. & Eliceiri, K. W. (2017) TrackMate: An open and extensible platform for single-particle tracking. *Methods*, 115, 80-90.

Watanabe, S., Noda, T. & Kawaoka, Y. (2006) Functional mapping of the nucleoprotein of Ebola virus. *Journal of virology*, 80, 3743-3751.

Wenigenrath, J., Kolesnikova, L., Hoenen, T., Mittler, E. & Becker, S. (2010) Establishment and application of an infectious virus-like particle system for Marburg virus. *The Journal of general virology*, 91, 1325-1334.

## Figure legends

### **Figure 1. Orientation of MARV nucleocapsid and its transport pathway. (a)**

The viral genome is encapsidated by NP. Nucleocapsids additionally contain VP24, VP30, VP35, and L. Among them, NP, VP24, and V35 form the core structure of the nucleocapsid called a “nucleocapsid-like structure (NCLS)”. (b) Nucleocapsids are formed in the perinuclear inclusion bodies and are subsequently transported along polymerized actin filaments to the plasma membrane, where budding and release of virions takes place. The VP40 protein forms filamentous virions together with GP.

### **Figure 2. Live-cell imaging system of MARV nucleocapsid-like structures.**

(a) The experimental setting for detection of NCLS transport. Huh-7 cells were transfected with plasmids encoding NP, L, VP35, VP24, VP40, GP, Marburg virus specific minigenome, T7 polymerase, and VP30-GFP. (b) Plasmid-transfected Huh-7 cells were observed at 18 h p.t. The image shows the maximum-intensity projection of time-lapse images of cells, recorded for 90 seconds; images were captured every 2 s. (c, d) Over 100,000 moving signals were captured and over 1,000 selected signals were analyzed using the Fiji plugin “TrackMate”. (c) The length of the NCLS trajectories was evaluated. The y-axis represents the number

of signals in each range (x-axis). The numbers indicate mean  $\pm$  SD ( $\mu\text{m}$ ). (d) The velocity of NCLSs transport was evaluated. The y-axis represents the number of signals in each range (x-axis). The numbers indicate mean  $\pm$  SD (nm/s).

**Figure 3. Effect of cytoskeleton-modulating drugs on MARV NCLSs**

**transport.** (a) Experimental setting to observe the effects of cytoskeleton modulating drugs on MARV NCLSs transport. Huh-7 cells were transfected with plasmids as described in Fig. 2(a), and treated at 15 h p.t. with either 0.15 % DMSO (control), 0.15  $\mu\text{M}$  nocodazole, or 0.3  $\mu\text{M}$  cytochalasin D. After 3 hours of treatment, observation of the cells began (18 h p.t.). (b-d) Time-lapse images were acquired for each of the drug treated cells (b: DMSO, c: Nocodazole, d: Cytochalasin D). The pictures show the maximum-intensity projection of time-lapse images of cells, recorded for 90 seconds; images were captured every 2 s. (e-i) Over 100,000 moving signals were captured and over 1,000 selected signals were analyzed using Fiji plugin “TrackMate”. (e-g) The length of the NCLS trajectories was evaluated in each of the drug treated cells (e: DMSO, f: Nocodazole, g: Cytochalasin D). The y-axis represents the number of signals in each range (x-axis). The numbers indicate mean  $\pm$  SD ( $\mu\text{m}$ ). (h-i) The velocity of NCLSs transport was evaluated in each of the drug treated cells (h: DMSO, i:

350 Nocodazole, j: Cytochalasin D). The y-axis represents the number of signals in  
 351 each range (x-axis). The numbers indicate mean  $\pm$  SD (nm/s).

(a)

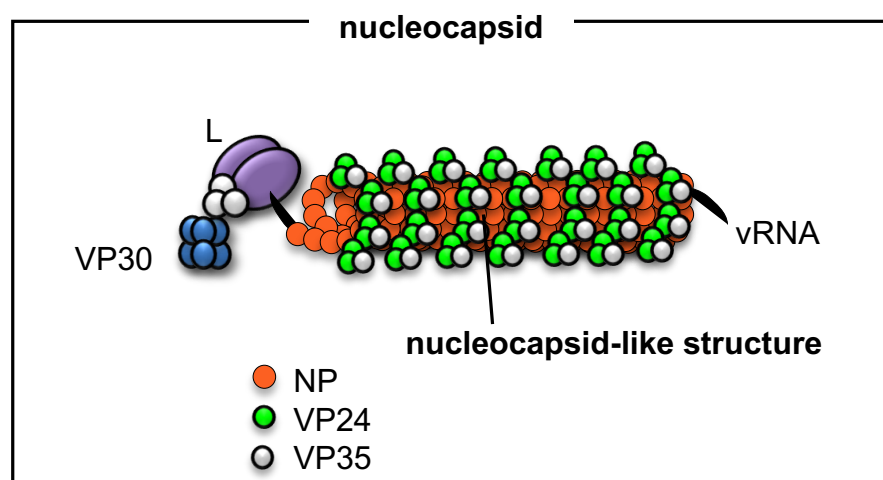

(b)

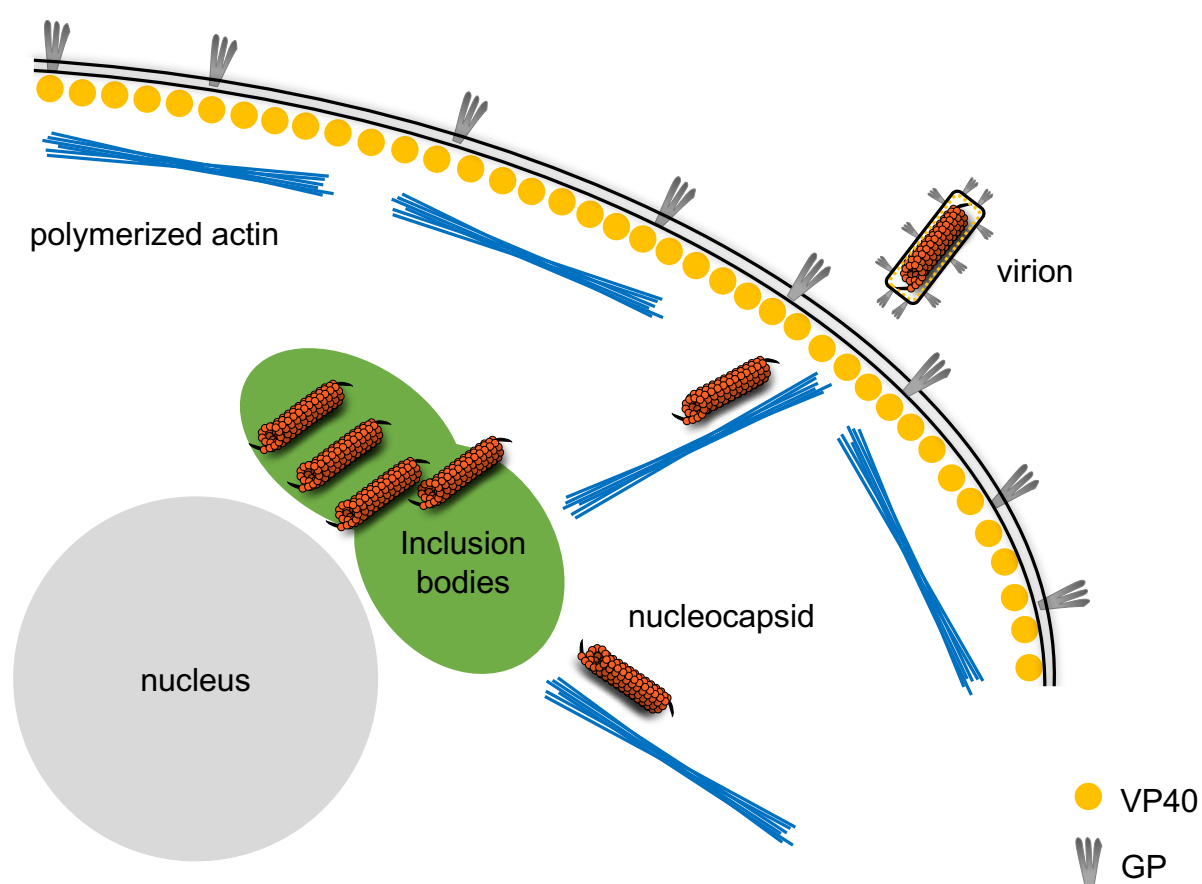

**Figure 1**

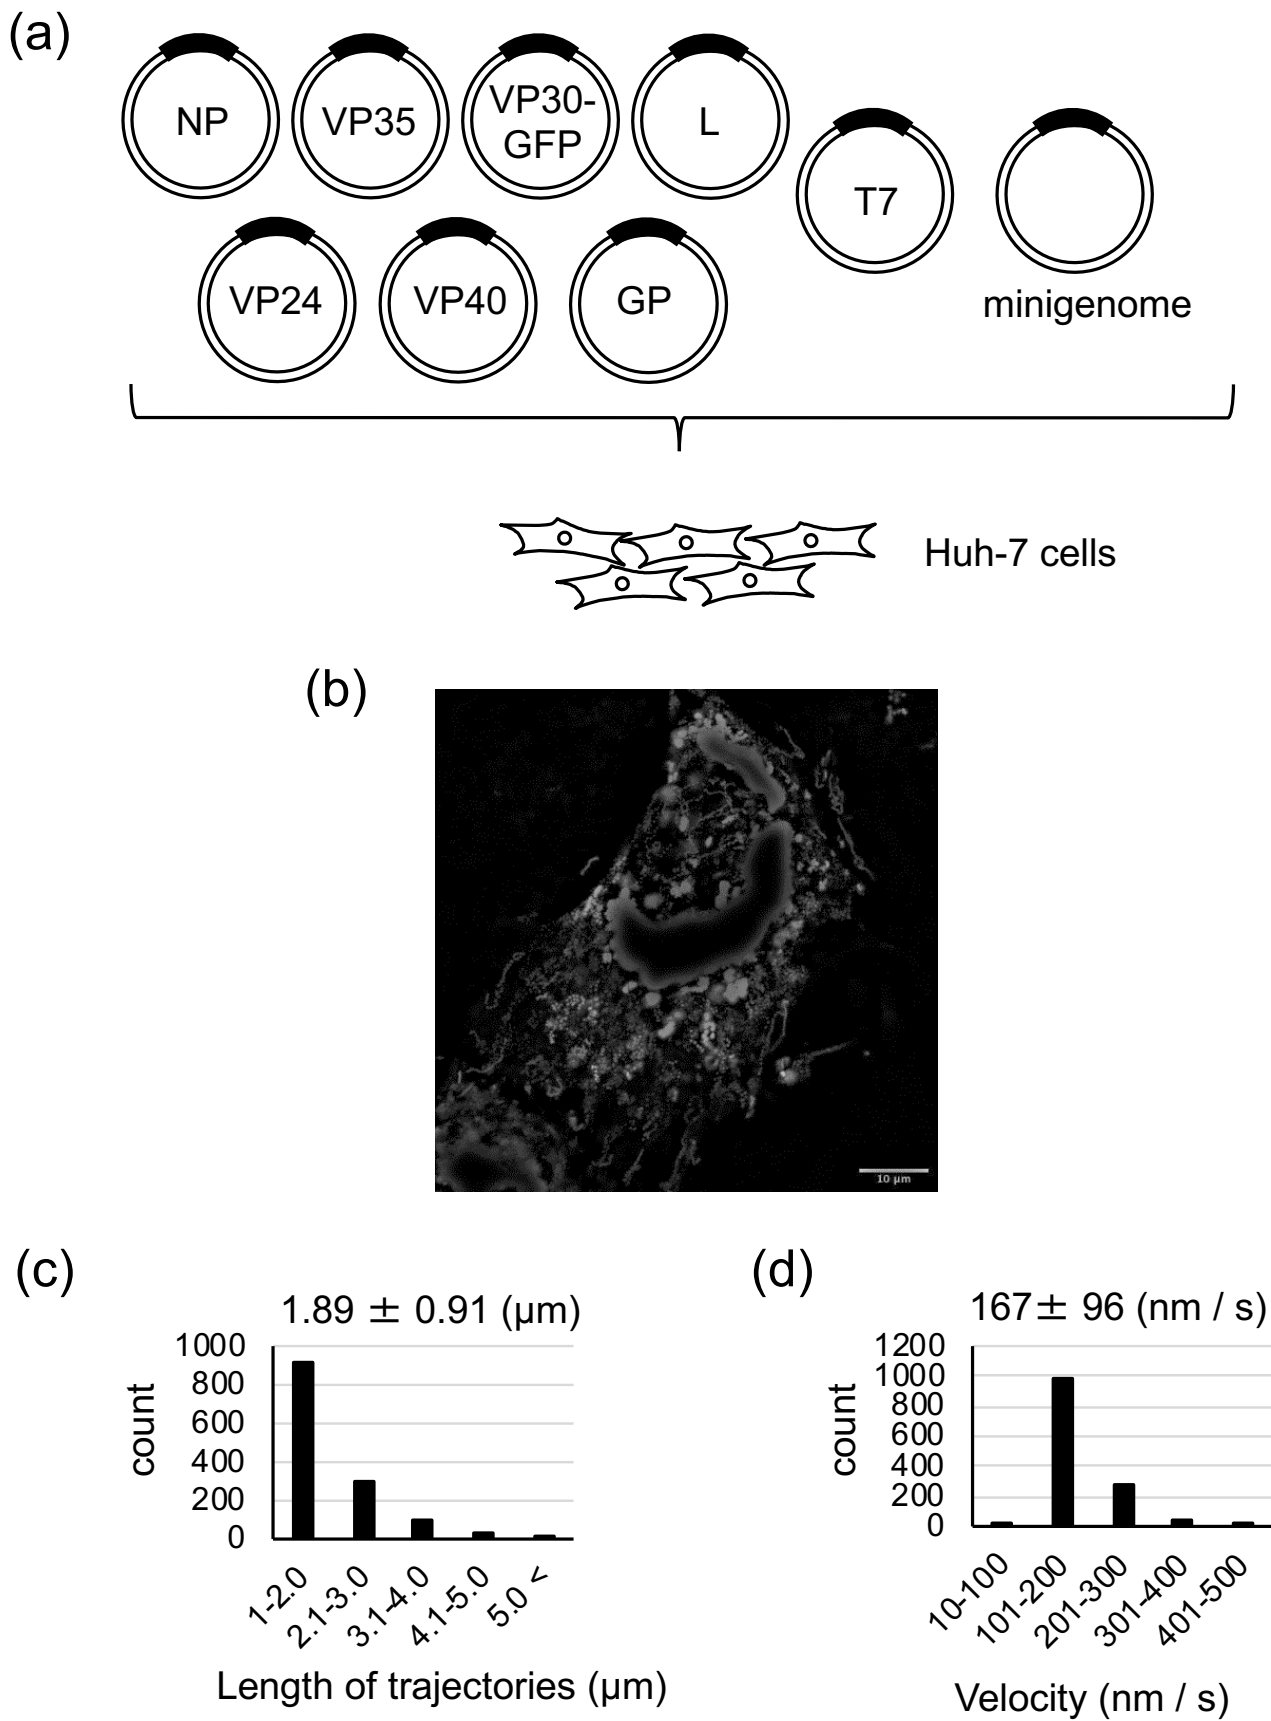

**Figure 2**

**Figure 3**

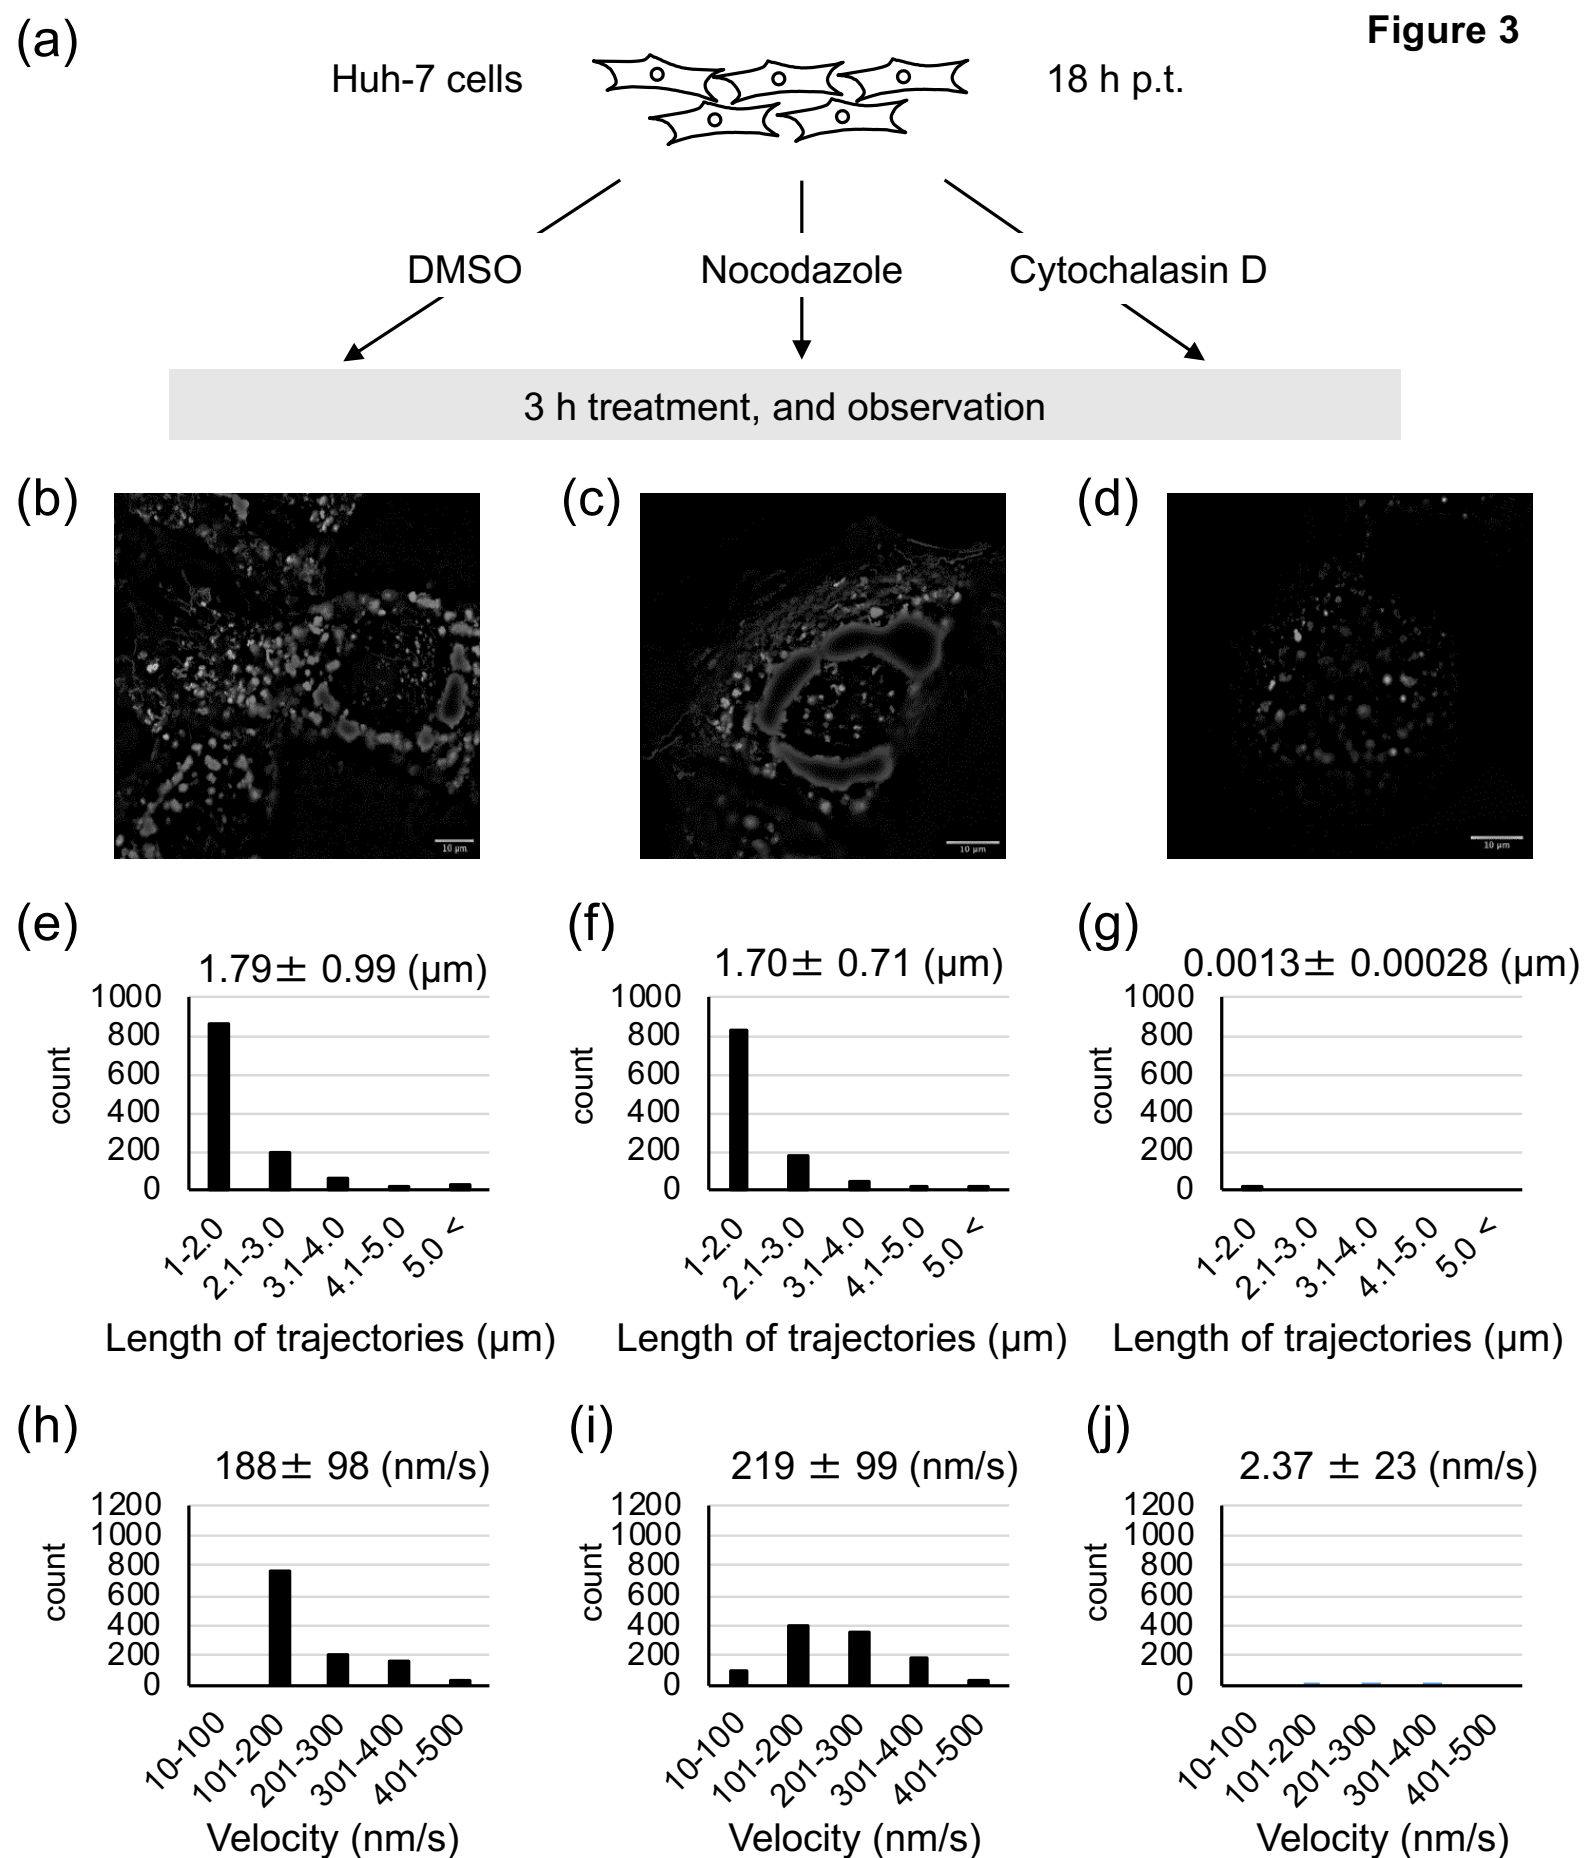

Source: https://www.biorxiv.org/content/10.1101/658419v3.full.pdf
